# Supplementary material for: Effect of bovine pericardial extracellular matrix scaffold niche on seeded human mesenchymal stem cell function
Source: PubMed Central journal article supplement (PMC5109049; doi:10.1038/srep37089), 2016-11-15
Supplement: srep37089-s1.pdf [file srep37089-s1.pdf]

**Effect of bovine pericardial extracellular matrix scaffold niche on seeded human mesenchymal stem cell function.**

Running headline: Extracellular matrix niche effects stem cell function

Zhi Zhao Liu, Maelene L. Wong, Leigh G. Griffiths\*

Department of Veterinary Medicine: Medicine and Epidemiology, University of California, Davis, One Shields Ave., Davis, CA 95616, USA

\*Corresponding author: Department of Medicine and Epidemiology, University of California, Davis, One Shields Avenue, Davis, CA, 95616, USA. Tel: +1 530 754 0334

*Email address:* lggriffiths@ucdavis.edu (Leigh G. Griffiths)

**adipogenic**

**osteogenic**

**chondrogenic**

**fibrous  
side**

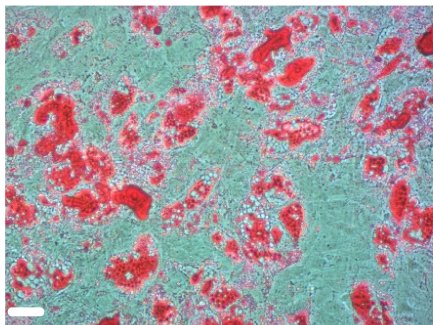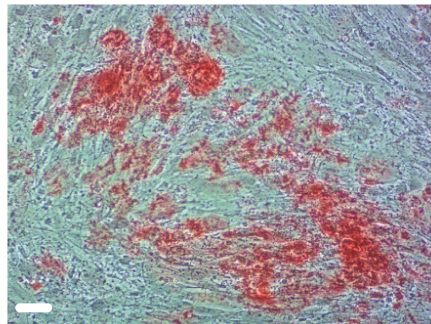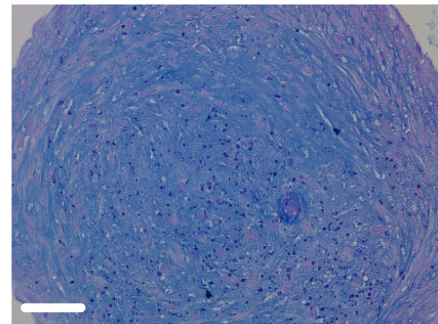

**serous  
side**

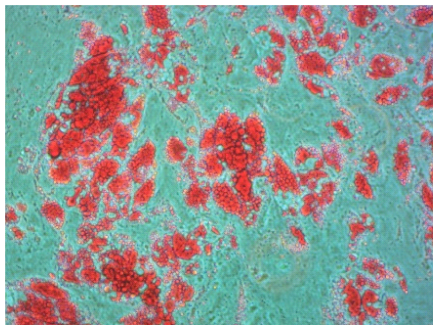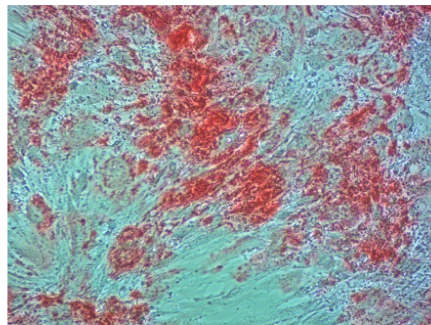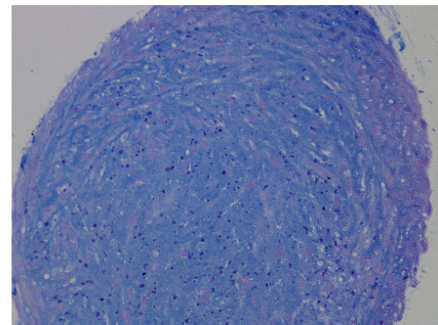

**Oil O Red**

**Alizarin Red S**

**Alcian Blue**

**Supplementary Fig. 1:** Trilineage differentiation of hMSC retrieved from ASB-14 scaffolds. Representative microscopic images of Oil Red O staining and Alizarin Red (100×) to confirm adipogenic and osteogenic differentiation of hMSC. Chondrogenic differentiation is confirmed by the formation of cell pellets that were positive for Alcian Blue (200×). Scale bar represents 100 μm. Upper row: induced hMSC detached from the fibrous side of ASB-14 scaffolds; lower row: induced hMSC detached off the serous side of ASB-14 scaffolds (n=5 per group).
